1 **Identification of disease resistance genes from a Chinese wild grapevine (*Vitis davidii*) by**  
2 **analysing grape transcriptomes and transgenic Arabidopsis plants**

3

4 **Running title**

5 **Disease resistance genes from a Chinese wild grapevine**

6 Ying Zhang<sup>1</sup>, Jia-Long Yao<sup>2</sup>, Hu Feng<sup>1</sup>, Jianfu Jiang<sup>1</sup>, Xiucui Fan<sup>1</sup>, Haisheng Sun<sup>1</sup>, Yun-Fei Jia<sup>1</sup>,

7 Yanyan Zhu<sup>1</sup>, Ran Wang<sup>1</sup>, Chonghuai Liu<sup>1\*</sup>

8

9 <sup>1</sup>Zhengzhou Fruit Research Institute, Chinese Academy of Agriculture Sciences, Zhengzhou  
10 450009, China

11 <sup>2</sup>The New Zealand Institute for Plant & Food Research Limited, Auckland, New Zealand

12 [zhangying05@caas.cn](mailto:zhangying05@caas.cn), [Jia-Long.Yao@plantandfood.co.nz](mailto:Jia-Long.Yao@plantandfood.co.nz), [fenghu01@126.com](mailto:fenghu01@126.com),

13 [jiangjianfu@caas.cn](mailto:jiangjianfu@caas.cn), [fanxiucui@caas.cn](mailto:fanxiucui@caas.cn), [sunhaisheng@caas.cn](mailto:sunhaisheng@caas.cn), [1259767472@qq.com](mailto:1259767472@qq.com),

14 [229317321@qq.com](mailto:229317321@qq.com), [wangran@caas.cn](mailto:wangran@caas.cn), [liuchonghuai@caas.cn](mailto:liuchonghuai@caas.cn)

15 **\*Corresponding author**

16 E-mail: [liuchonghuai@caas.cn](mailto:liuchonghuai@caas.cn)

17

18 **Date of submission**

19

20 **Word count: 6, 898**

21

22 **Number of figures: Eight**

23

24 **Number of tables: Four**

25 **Identification of disease resistance genes from a Chinese wild grapevine (*Vitis davidii*) by**  
26 **analysing grape transcriptomes and transgenic Arabidopsis plants**

27

28 **Highlight**

29 Transcription profiles showed that 20 candidate genes were obviously co-expressed at 12 hpi in  
30 *Vitis davidii* .

31 VdWRKY53 transcription factor enhanced the resistance in grapevine and Arabidopsis.

32

### 33 **Abstract**

34 The molecular mechanisms underlying disease tolerance in grapevines remain uncharacterized,  
35 even though there are substantial differences in the resistance of grapevine species to fungal and  
36 bacterial diseases. In this study, we identified genes and genetic networks involved in disease  
37 resistance in grapevines by comparing the transcriptomes of a strongly resistant clone of Chinese  
38 wild grapevine (*Vitis davidii* cv. Ciputao 941, *DAC*) and a susceptible clone of European  
39 grapevine (*Vitis vinifera* cv. Manicule Finger, *VIM*) before and after infection with white rot  
40 disease (*Coniella diplodiella*). Disease resistance-related genes were triggered in *DAC*  
41 approximately 12 hours post infection (hpi) with *C. diplodiella*. Twenty candidate resistant genes  
42 were co-expressed in *DAC*. One of these candidate genes, *VdWRKY53* (GenBank accession  
43 KY124243), was over-expressed in transgenic *Arabidopsis thaliana* plants and was found to  
44 provide these plants with enhanced resistance to *C. diplodiella*, *Pseudomonas syringae* pv  
45 *tomato* PDC3000, and *Golovinomyces cichoracearum*. This result indicates that *VdWRKY53* may  
46 be involved in nonspecific resistance via interaction with fungal and oomycete elicitor signals  
47 and the activation of defence gene expression. These results provide potential gene targets for  
48 molecular breeding to develop resistant grape cultivars.

49

50 **Key words:** Chinese wild grapevine, grapevine white-rot, disease resistance, transcriptome,  
51 candidate genes, *VdWRKY53* transcription factor

### 52 **Abbreviations**

## 53 **Introduction**

54 The grapevine is an important fruit crop grown worldwide, and its cultivars are mostly derived  
55 from the European species *Vitis vinifera*, which possesses genes for high fruit quality and  
56 adaptation to a wide variety of climatic conditions. However, *V. vinifera* cultivars are susceptible  
57 to many pathogens, such as phytoplasmas, viruses, bacteria, and fungi (Ferreira *et al.*, 2004).

58 Infection of grapevines with the fungus *Coniella diplodiella* (Speg.) causes a devastating  
59 white rot disease resulting in partial to total crop losses. This disease also has severe impacts on  
60 the environment because repeated fungicide applications are required to control the disease. *C.*  
61 *diplodiella* obtains nutrients from infected leaf and berry tissues and eventually decays these  
62 tissues. In contrast to *Plasmopara viticola* (causing downy mildew in grapevine) infection with  
63 haustoria, *C. diplodiella* exhibits an ambiguous infection pattern. To ward off these tenacious  
64 pathogens, plants have developed a vast array of immune responses. Plants, including *Vitis*  
65 species, show different resistance levels depending on their different immune mechanisms. In  
66 contrast to *V. vinifera* cultivars, most clones of the Chinese wild species *DAC* exhibit high levels  
67 of resistance (Ferreira *et al.*, 2004), allowing major quantitative trait loci (QTL) of resistance  
68 genes (Bellin *et al.*, 2009; Marguerit *et al.*, 2009) to be mapped. QTL mapping will assist  
69 breeders in the introgression of these genes into *V. vinifera*-based cultivars. Conventional  
70 breeding has created some interspecific hybrids that are resistant to fungal diseases, but this  
71 process is long and inefficient. Further breeding work is required to combine resistance with  
72 berry quality suitable for table and wine grapes. This breeding process will be greatly accelerated  
73 by the availability of grapevine genome sequences (Jaillon *et al.*, 2007) and marker-assisted  
74 selection (Jaillon *et al.*, 2007; Costantini *et al.*, 2008).

75 Of approximately 70 *Vitis* species worldwide, 38 originate in China (Kong, 2004).  
76 Chinese wild grapevines are a very important source of grapevine germplasm for breeding new  
77 cultivars. Studies have already revealed that Chinese wild grapevines possess resistance genes  
78 and special resistance mechanisms (Li *et al.*, 2012). We have collected 500 accessions from 20  
79 Chinese wild grapevine species in a germplasm nursery and found one accession, *Vitis davidii*

80 0941, with the highest level of resistance after *in vitro* testing (Zhang *et al.*, 2013). However, it is  
81 not yet known which genes regulate these resistance traits in grapes.

82 The expression of resistance genes is often induced by pathogen infection in resistant  
83 plants (Tao *et al.*, 2003; Tripathi *et al.*, 2012; Phukan *et al.*, 2016). This type of expression may  
84 be much weaker or even absent in susceptible plants. Resistance genes are among the  
85 differentially expressed genes (DEGs) that can be identified by comparative analysis of the  
86 transcriptomes of resistant and susceptible plants after infection (Ma *et al.*, 2016). Therefore, we  
87 chose to use this technology to reveal the DEGs between susceptible and resistant grapevine  
88 species associated with resistance responses to *C. diplodiella* from early to late stages of  
89 infection.

90 We found that *Vitis davidii* expressed resistance genes in the early stage of infection, but *V.*  
91 *vinifera* did not. We further identified 20 candidate resistance genes. Over-expression of one of  
92 the candidate genes, *VdWRKY53*, in transgenic Arabidopsis plants conferred resistance to *C.*  
93 *diplodiella*, *Pseudomonas syringae* pv *tomato* PDC3000, and *Golovinomyces cichoracearum*  
94 (powdery mildew of Arabidopsis).

95

## 96 **Materials and methods**

97

### 98 ***Observations of microstructure and ultrastructure of leaves***

99 Leaf samples 0.25 cm<sup>2</sup> in area were collected from the middle of five healthy mature leaves from  
100 *Vitis vinifera* cv. Manicure Finger (VIM) and *Vitis davidii* cv. Ciputao 0941(DAC) and fixed in FAA  
101 fixative (mixing alcohol acetate formalin fixative). After the leaves became transparent, they  
102 were washed in water for 4 h, transferred into a solution of glycerol: lactic acid: water (volume  
103 ratio 1: 1: 1) for 24 h and stored until use. The leaves were stained for 20 min in 0.5% aniline  
104 blue (dissolved in a mixture of glycerol: lactic acid: water, volume ratio 1: 1: 1), rinsed with  
105 ethanol (Vanacker *et al.*, 2000) and observed under a dissecting microscope.

106 The samples were then embedded in paraffin and cut into 10- $\mu$ m-thick sections that were

107 stained with haematoxylin and then examined under a microscope (Lycra DMi1-PH1, Germany)  
108 and photographed with an Olympic BX51 camera, Japan (Lighezan *et al.*, 2009).

109 The ultrastructure was observed using a transmission electron microscope (TEM) based  
110 on the method described by Lighezan *et al.* (2009). Images were taken with a HITACHI 7000  
111 TEM.

### 112 ***Plant material and pathogen inoculation treatments on grapevine***

113 For mRNA sequencing analysis, *Vitis vinifera* cv. Manicure Finger (VIM) and *Vitis davidii* cv.  
114 Ciputao 941 (DAC) were grown in a greenhouse at 28°C with a 16 h photoperiod and inoculated  
115 with *C. diplodiella* (Speg.) (strain WR01, from the Institute of Plant Protection, CAAS)  
116 mycelium gelose discs from a 7-day-old culture grown at 28°C on potato dextrose agar (PDA)  
117 medium. Leaf samples were collected at 0, 12 and 36 hpi and were immediately frozen in liquid  
118 nitrogen and stored at -80°C in a freezer. Each sample consisted of pooled specimens from three  
119 leaves of three plants.

120

### 121 ***RNA extraction, library construction, and RNA-seq***

122 For RNA-seq library construction, the total RNA was extracted from six samples using the Total  
123 RNA Extraction Kit (BioFlux, Tokyo, Japan). The samples were named *VIM1*, *VIM2*, *VIM3*,  
124 *DAC1*, *DAC2*, and *DAC3* for *VIM* and *DAC* collected at 0, 12 and 36 hpi, respectively. The RNA  
125 quality and purity were checked using 1% agarose gels and a NanoPhotometer®  
126 spectrophotometer (IMPLEN, CA, USA).

127 Sequencing libraries were generated using 3 µg of RNA per sample as input material and  
128 the NEB Next® Ultra™ RNA Library Prep Kit for Illumina® (NEB, USA). Index codes were  
129 added to each sample to tag its sequences. Library quality was assessed on an Agilent  
130 Bioanalyzer 2100 system. The index-coded samples were clustered on a cBot Cluster Generation  
131 System using the TruSeq PE Cluster Kit v3-cBot-HS (Illumina) according to the manufacturer's  
132 instructions. After cluster generation, the libraries were sequenced by Novogene (Beijing) on an  
133 Illumina HiSeq 2000 platform to generate 100-bp paired-end reads.

134

### 135 ***Data assembly and analysis***

136 Raw data (raw reads) in fastq format were first processed using in-house Perl scripts. Clean data  
137 (clean reads) were obtained by removing reads containing the adapter, reads containing poly-N  
138 and low-quality reads from the raw data. At the same time, the Q20, Q30 and GC contents of the  
139 clean data were calculated. All downstream analyses were based on the clean data with high  
140 quality.

141 Reference genome and gene model annotation files were downloaded from the genome  
142 website ([http://plants.ensembl.org/Vitis vinifera](http://plants.ensembl.org/Vitis_vinifera)). An index of the reference genome was built  
143 using Bowtie v2.0.6, and paired-end clean reads were aligned to the reference genome using  
144 TopHat v2.0.9. The number of reads mapped to each gene was counted using HTSeq v0.5.4p3. In  
145 addition, the RPKM (Reads Per Kilobase of transcript per Million mapped reads) of each gene  
146 was calculated based on the length of the gene transcript, the reads mapped to the gene, and the  
147 total mapped reads (Mortazavi *et al.*, 2008).

148 Prior to differential gene expression analysis, for each sequenced library, the read counts  
149 were adjusted by the edge R program package with one normalized scaling factor. The  
150 differential expression under two conditions was analysed using the DEGseq R package (1.12.0).  
151 The P values were adjusted using the Benjamini & Hochberg method. A corrected P value of  
152 0.001 and a log<sub>2</sub> (Fold change) of 1 were set as the threshold for significantly differential  
153 expression.

154

### 155 ***Gene co-expression analysis***

156 Gene co-expression network analysis was performed on each RNA-seq library to analyse the  
157 correlation of genes from each experimental sample, followed by a search for resistance-related  
158 pathways and genes (Gillis and Pavlidis, 2011). We also used the WGCNA method to test the  
159 effect of thresholding the networks (Zhang and Horvath, 2005). We subjected the best WGCNA  
160 results to MeV K-means analysis, setting the cluster number to 50 (k=50).

161

162 ***Annotation and functional classification***

163 Gene Ontology (GO) enrichment analysis of the DEGs was implemented with the GO seq R  
164 package, in which gene length bias was corrected. GO terms with corrected P values less than  
165 0.05 were considered to be significantly enriched in the DEGs. We used the KOBAS software to  
166 test the statistical enrichment of the differential expression of genes in KEGG pathways. Putative  
167 gene functions were assigned using a set of sequential BLAST searches of all the assembled  
168 unigenes against sequences in the Ensembl Plants ([http://plants.ensembl.org/Vitis vinifera](http://plants.ensembl.org/Vitis_vinifera))  
169 database of non-redundant proteins and nucleotides, the Swiss-Prot protein database, the Gene  
170 Ontology database, the Cluster of Orthologous Groups database, and the Kyoto Encyclopedia of  
171 Genes and Genomes database.

172

173 ***qRT-PCR analysis***

174 The total RNA of grapevines was extracted using the improved SDS/phenol method as described  
175 by (Ülker *et al.* 2007). PCR primers for the reference gene *EF1 r* and the test genes are listed in  
176 Table S1. Three independent PCR reactions were conducted for each gene using a LightCycler®  
177 480 (Roche Diagnostics, Rosel, Switzerland), and the relative expression levels of the genes  
178 were calculated using the  $2^{-\Delta\Delta ct}$  method (Ramamoorthy *et al.*, 2008).

179

180 ***Vector construction and Arabidopsis transformation***

181 The full-length cDNA of *VdWRKY53* was amplified by PCR and cloned into the BglII/BstE2 site  
182 of the binary plasmid pCAMBIA3301, generating pCAMBIA3301-*VdWRKY53* (pGW53). This  
183 new plasmid was verified by sequencing and then introduced into *A. tumefaciens* GV3101 cells  
184 for Arabidopsis transformation via the floral dipping method (Clough and Bent, 1998).

185

186 ***Pathogenic fungus/bacterium inoculation on Arabidopsis***



187 *C. diplodiella* was tested on wild-type (Columbia (Col)) and transgenic (GW53) Arabidopsis  
188 plants, which were grown in a culture chamber (25°C; 12 h photoperiod; light intensity 100  $\mu\text{mol}$   
189  $\text{m}^{-2}\text{s}^{-1}$ ). The powdery mildew (*Golovinomyces cichoracearum*) isolate UCSC1 was cultured on  
190 Arabidopsis *phytoalexin cichoracent 4 (pad4)* mutant plants. Powdery mildew inoculation of  
191 Arabidopsis was performed as previously described (Wang *et al.*, 2007). The bacterial strain  
192 *Pseudomonas syringae* pv tomato PDC3000 was grown in LB liquid medium (Yu *et al.*, 2011),  
193 and the inoculation method was based on Melotto *et al.* (2008).

194

## 195 **Results**

196

### 197 ***Anatomical structure of Vitis leaves and inoculation in grapevines***

198 *DAC* is an important wild grapevine species that grows in 10 provinces in China. In our  
199 experiments, *DAC* showed the highest level of resistance among all grapevines tested (Zhang *et*  
200 *al.*, 2013; Zhang and Feng, 2014). Examination of the anatomical structure revealed that the  
201 leaves of *DAC* were not significantly different from those of *VIM* in thickness, including the  
202 thickness of the palisade, spongy tissues, and upper and lower epidermis (Table 1, Fig. 1A).  
203 Except for a higher number of chloroplasts in the palisade of *DAC* than in that of *VIM* (Fig. 1A),  
204 which is important in photosynthesis, *DAC* had a similar leaf structure to *VIM*. This result  
205 suggests that the differences in disease resistance between *DAC* and *VIM* are unlikely to be due  
206 to the differences in their leaf structure and more likely to be due to the differences in their  
207 resistance genes.

208 After infection with *C. diplodiella*, the *DAC* leaves showed weaker disease symptoms  
209 than those on *VIM* leaves at 12 hours post infection (hpi). At 36 hpi, the symptoms on *DAC*  
210 leaves developed into a typical hypersensitive response (HR), where cell death at the infection  
211 site blocked further spreading of the pathogen, but the symptoms on *VIM* leaves developed into  
212 typical grape white rot disease (Fig. 1B). Under a microscope, germination of spores of *C.*  
213 *diplodiella* was observed on *VIM* leaves but not on *DAC* leaves at 12 hpi. At 36 hpi, spore

214 germination was completed on the leaves of both grape species, but the germination rate was  
215 lower on *DAC* leaves than on *VIM* leaves (Fig. 1C). The hyphal growth rate and state were  
216 similar on leaves of the two grape species. Given the importance of 12 and 36 hpi in disease  
217 development, we chose these two time points for transcriptome comparison with the 0 hpi stage.

218

### 219 ***mRNA sequencing statistics***

220 To analyse the transcript levels of *DAC* and *VIM* at 0, 12, and 36 hpi with *C. diploidiella*,  
221 approximately 433 million reads were generated from the six libraries (*VIM1*, *VIM2*, *VIM3*,  
222 *DAC1*, *DAC2*, and *DAC3*). These reads constitute 42.32 Gb of cDNA sequence (Table 2). Among  
223 them, 97.2% were high-quality (Q>20) reads and were selected for further analyses. Of the clean  
224 reads, 76.96-88.01% were mapped to the *Vitis vinifera* reference genome  
225 ([http://plants.ensembl.org/Vitis\\_vinifera](http://plants.ensembl.org/Vitis_vinifera)) (Jaillon *et al.*, 2007). For each library, the reads were  
226 mapped to approximately 23-25 thousand genes, of which approximately one thousand were  
227 novel genes that were not annotated in the grape reference genome (Table 2).

228

### 229 ***Identification of differentially expressed genes (DEGs)***

230 A total of 12976 genes were selected for DEG analyses on the basis that they had a RPKM value  
231 greater than 1 (value >1) according to DEGseq. The number of DEGs between the resistant  
232 (*DAC*) and susceptible (*VIM*) grape species at each sampling point was estimated using the  
233 criteria  $P < 0.001$  and  $\log_2$  (fold change)  $> 2.0$  or  $< -2.0$ .

234 After *C. diploidiella* inoculation, we detected a total of 7073 transcripts, exhibiting an  
235 increase compared with the 0 hpi time point. More transcripts were induced in *DAC* than in *VIM*.  
236 256 transcripts of the specific expression in *DAC* was of unknown genes showing a large genetic  
237 distance from the reference genome ([http://plants.ensembl.org/Vitis\\_vinifera](http://plants.ensembl.org/Vitis_vinifera)) (Fig. 2).

238 All DEGs were annotated. COG, GO, KEGG, Swiss-Prot and nr were analysed based on  
239 their references (Altschul *et al.*, 1997; Tatusov *et al.*, 2000; Kanehisa *et al.*, 2004) (Table 3). To  
240 determine the DEGs and pathways between the susceptible *VIM* and the resistant *DAC*, we

241 analysed the KEGG pathways in detail. We found two pathways with no DEGs (Brassinosteroid  
242 biosynthesis and Cutin, suberine and wax biosynthesis) and 118 pathways with DEGs.  
243 Differences in gene expression at two time points after pathogen infection in *VIM* and *DAC* were  
244 examined, and DEGs were identified by pairwise comparisons of the six libraries (Table S2,  
245 Table S3).

246

### 247 ***Candidate genes in resistant grapevine DAC***

248 We focused on the Plant-pathogen interaction pathway, which involved DEGs including cell  
249 wall genes, LRR receptor-like genes, *WRKY* genes and pathogenesis-related (PR) genes. All  
250 transcripts were divided into four co-expression groups. Among them, the molecular function  
251 group genes were divided into 50 co-expression clusters (K=50) by MeV K-means analysis,  
252 corresponding to the RPKM value. The transcript levels of these genes were higher in DAC than  
253 in *VIM* at both stage 0 hpi and 12 hpi, the transcript levels of these genes were reduced at 36 hpi  
254 compared to 0 hpi and 16 hpi in both *VIM* and *DAC* (Fig. 3 Table S4).

255         Based on the analysis of the transcript expression, which was highly correlated with the  
256 resistance response, we suggested 20 candidate genes that work together in the SA signal  
257 pathway for *DAC* resistance to *C. diplodiella* and are co-expressed in the K03 cluster. The  
258 expression of these genes in *DAC* showed significant differences from their expression in *VIM*.  
259 The RPKM measure of read density reflects the molar concentration of a transcript (Mortazavi *et*  
260 *al.*, 2008), We assessed the candidate genes based on two factors, RPKM value (RPKM>1 after  
261 inoculation) and the expression change fold (fold>2). There were two wall-associated receptor  
262 kinase genes, five LRR receptor-like serine/threonine-protein kinase genes, eleven *WRKY*  
263 transcription factor genes, and two PR protein-like genes in the same resistance signalling  
264 pathway. We compared the data between the two species from the six libraries (Table 4). We  
265 identified the expression of twenty candidate genes by comparing the RPKM values from the  
266 RNA-seq data with the quantitative RT-PCR results at 12 hpi. Nineteen genes were found to have  
267 high RPKM values and up-regulated expression, while one gene (*VIT\_14s0081g00020*) with a

268 high RPKM value was down-regulated at 12 hpi in *DAC* (Fig. 3).

269

### 270 ***Verification of candidate WRKY53 genes***

271 In higher plants, *WRKY* genes play a variety of roles. Accumulating evidence indicates that  
272 *WRKY* transcription factors are involved in the responses to biotic stresses as well as in plant  
273 development (Chen and Chen, 2000; Du and Chen, 2000; Eulgem *et al.*, 2000). *WRKY* proteins  
274 comprise a large family of transcription factors (Ulker and Somssich, 2004) that are potentially  
275 involved in the regulation of transcriptional reprogramming responsible for plant immune  
276 responses (Eulgem and Somssich, 2007). In our results, eleven *WRKY* genes were identified as  
277 candidate resistant genes because their expression was positively correlated with resistance to *C.*  
278 *diplodiella* in *DAC*. One of these *WRKY* genes, *VdWRKY53* (Genbank accession KY124243) was cloned  
279 from *DAC* and further characterized. The *WRKY* domain of *VdWRKY53* belonged to Group III  
280 subfamily of *WRKY* family. In plants, the Group III subfamily of *WRKY* were considered to be the most  
281 evolutionarily advanced and the most adaptable group, and to be co-evolved with disease resistance genes.  
282 *VdWRKY53* was found to be closely related to *VvWRKY30*, 46, 41 and *AtWRKY41* and 53 in a  
283 phylogenetic analysis using all members of *WRKY* III subfamily from *Vitis* and *A. thaliana* (Fig. 5). *A.*  
284 *thaliana* with *AtWRKY53* loss of function mutants showed delayed development of disease symptom after  
285 infection of *Ralstonia solanacearum*, but increased susceptibility toward *Pseudomonas syringae* (Murray  
286 *et al.*, 2007). The expression of *AtWRKY41* is specifically suppressed by a compatible strain of *P.*  
287 *syringae* in an effector-dependent manner (Pandey and Somssich, 2009).  
288 Classifying *VdWRKY53* into the same clade as *AtWRKY41* and 53 suggests a function of *VdWRKY53*  
289 in disease resistance. To confirm the function of *VvWRKY53*, *Arabidopsis* transgenic plants were produced  
290 using the pGW53 construct for over-expression of *VvWRKY53*. Homozygous transgenic plants were  
291 identified from three independent transgenic lines, GW53-1, -2, and -3, by growing them to T3 generation.  
292 The homozygous transgenic plants and wild-type *Col* plants were infected by *C. diplodiella*, *G.*  
293 *cichoracearum* and PDC3000. As determined by q-RT-PCR analyses, *VdWRKY53* was expressed in all  
294 three transgenic lines prior and post infection of the three diseases. The expression levels were between

295 0.5 and 2 folds of the mRNA levels of the Arabidopsis house-keeping gene *AtActin* (Fig 6). Signal for  
296 *VvWRKY53* expression in WT Col plants were at background level for most samples, and at a low level  
297 for some samples of Col-2. The low level of signal could be the result of non-specific amplification of  
298 Arabidopsis genes with homology to the primers. Consistent with the over-expression of *VdWRKY53* in  
299 GW53, the disease resistant level was remarkable improved. The GW53 plants were more resistant to *C.*  
300 *diplodiella*, PDC3000 and *G. cichoracearum* than Col plants. After infection by *G. cichoracearum*,  
301 GW53 plants grew normally with green and health leaves even powdery mildew was present on their  
302 leaves. Whereas, WT Col plants developed a strong disease symptom, with yellow and even dead leaves.  
303 The same results happened to *C. diplodiella* and PDC3000 infection. Most of GW53 plants could grow  
304 normally with *C. diplodiella* and PDC3000, but Col could not (Fig. 7). For GW53 transgenic plants, 95%,  
305 98% and 100% of leaves were free of disease symptoms after infection with *G. cichoracearum*, *P.*  
306 *syringae* PDC3000, and *C. diplodiella* respectively (Fig. 8). For WT Col plants, only 5%, 0% and 2%  
307 leaves were free of disease symptoms after infection with the three diseases respectively.

308

## 309 **Discussion**

310

### 311 ***Rapid response contributes to DAC resistance to disease***

312 The first layer of plant defence against pathogens is the cell wall-associated response: pathogenic  
313 microorganisms must actively penetrate the plant apoplast for access. The second layer of plant  
314 defence is the HR, in which cell death surrounding an infection restricts the growth of pathogens.  
315 Ralph Huckelhoven considered HR-associated cell death to be a complex defence that depends  
316 on the timing of HR (Huckelhoven, 2007). In our study, when *C. diplodiella* invaded, *DAC*  
317 quickly showed a typical HR quickly. HR and cell death limited pathogen invasion, and then  
318 resistance genes in the signalling pathway were switched on (Fig. 1B, C). In comparison with  
319 VIM, 20 genes co-expressed in the HR showed changes in *DAC* at the 12 hpi time point (Fig.  
320 2D). This result indicated that a key switch for the *DAC* resistance response occurs near the 12  
321 hpi time point, which was also observed in other resistant grapevine species, such as *Vitis riparia*

322 (resistant) after infection with *Plasmopara viticola* (Polesani *et al.*, 2010). *DAC* could rapidly  
323 perceive microbial molecules by surveillance of host cellular intactness, which is a common  
324 mechanism in plants. This mechanism has also been observed in *V. riparia* infected with *P.*  
325 *viticola* (Polesani *et al.*, 2010). A special mechanism of pathogen defence was observed in the  
326 resistant species *DAC*, which quickly recognized the infection signal and activated the HR  
327 reaction.

328

### 329 ***Candidate genes contributed to defence in DAC***

330 Detailed pathogen resistance mechanisms have been described in plant models. They involve  
331 complicated signalling pathways and a cascade of resistance genes triggered by an elicitor. Plants  
332 use PAMPs (pathogen-associated molecular patterns) or DAMPs (damage-associated molecular  
333 patterns) to recognize general elicitors or a special elicitor, which is similar to the innate immune  
334 system in animals (Jones and Dangl, 2006). When a fungus infects plants, there are exchanges of  
335 signals between the pathogen and the plants (Grenville-Briggs and van West, 2005).

336 Cell wall-associated plant defence is the first and most important barrier in basal  
337 resistance. Basal resistance seems to be suppressed by virulent pathogens but boosted in induced  
338 and race-specific resistance. In *Oryza sativa*, *OsWAK1* transcripts were significantly induced by  
339 *Magnaporthe oryzae* and play important roles in rice blast disease resistance (Ali *et al.*, 2009). In  
340 this study, two wall-associated receptor kinase (WAK) genes (VIT\_18s0041g00020,  
341 VIT\_18s0001g11620) were listed as candidate resistance genes.

342 In both plant resistance and animal innate immunity, serine/threonine-rich repeat receptor-like  
343 kinases contribute to the detection of conserved nonself molecules (Jones and Takemoto, 2004;  
344 Chisholm *et al.*, 2006; Huckelhoven, 2007). Five receptor kinase category candidate genes were  
345 listed as candidates, namely, LRR receptor-like serine/threonine protein kinases  
346 (VIT\_12s0035g00070, VIT\_10s0092g00590, VIT\_12s0055g00580,  
347 *Vitis vinifera*\_newGene\_4892, *Vitis vinifera*\_newGene\_4928). The downstream  
348 phosphorylation of a WRKY transcription factor ultimately led to the activation of

349 defence-related genes and the partial restriction of pathogen growth (Asai *et al.*, 2002). WRKY  
350 transcription factors are involved in nonspecific fungal and oomycete elicitor signal transduction  
351 leading to defence gene expression (Cormack *et al.*, 2002; Huckelhoven, 2007). Eleven WRKY  
352 transcription factors contributed to defence in this study, showing co-expression in K03 clusters.  
353 WRKY transcription factors ultimately lead to the activation of defence-related genes and the  
354 partial restriction of pathogen growth (Ali *et al.*, 2009). Pathogenesis-related proteins are  
355 secreted into the defence system during the resistance response; for example,  
356 pathogenesis-related protein 1 (PR-1) has antifungal and antibiotic activity (Rauscher *et al.*, 1999;  
357 Huckelhoven, 2007; Yu *et al.*, 2013). In our data, two PR-1 protein type genes  
358 (VIT\_11s0052g01620, VIT\_14s0081g00020) in *DAC* were shown to participate in the defence  
359 against pathogen invasion. In plants, the resistance response is a very complicated system that  
360 includes structure and strengthening the cell walls (Huckelhoven, 2007) and the PR protein HR  
361 (Greenberg and Yao, 2004), through which cells initiate death after infection to block further  
362 infection by the pathogen and allow the plant to survive.

363

#### 364 ***Candidate gene VdWRKY53 improved the resistance of Arabidopsis***

365 WRKY transcription factors comprise a large family of regulatory proteins and have been  
366 implicated in the defence against pathogens in plants (Pandey and Somssich, 2009). In grapes,  
367 *VvWRKY1* and *VvWRKY2* conferred enhanced resistance against fungal pathogens in transgenic  
368 tobacco plants (Guillaumie *et al.*, 2010). *VvWRKY11* provides higher tolerance to water stress  
369 induced by mannitol compared with the tolerance in wild-type plants, indicating that *VvWRKY11*  
370 is involved in the response to dehydration stress (Liu *et al.*, 2011). The *VpWRKY1*, *VpWRKY2*  
371 and *VpWRKY3* genes isolated from *Vitis pseudoreticulata* enhanced resistance to biotic and  
372 abiotic stress responses (Zhu *et al.*, 2012). *VdWRKY53* belongs to the group III WRKY  
373 transcription factors and is very similar to *AtWRKY53* (Fig. 4). The *AtWRKY53* gene was  
374 rapidly induced under drought conditions (Sun and Yu, 2015) and found to positively regulate the  
375 basal resistance to *P. syringae* in combination with the *AtWRKY46* and *AtWRKY70* genes (Hu *et*

376 *al.*, 2012). SolyWRKY53, an orthologous gene to AtWRKY53, is also resistant to TYLCV  
377 infection (Huang *et al.*, 2016). In this study, the *VdWRKY53* gene showed higher expression in  
378 *DAC* than in *VIM* even at 0 hpi. The RPKM value reached 109.9 at approximately 12 dpi and  
379 contributed to the resistance to *C. diplodiella* (Table 4). We cloned the *VdWRKY53* CDS  
380 sequence and transferred it into Arabidopsis to generate five lines of transgenic plants  
381 over-expressing *VdWRKY53*. As we expected, *VdWRKY53* conferred strong resistance to *C.*  
382 *diplodiella*, PDC3000 and *G. cichoracearum*. Candidate genes from the K03 cluster were  
383 co-expressed and located in the same resistance pathway (Broekaert *et al.*, 2006; Eulgem, 2006;  
384 Eulgem and Somssich, 2007; Zhang and Feng, 2014; Ma *et al.*, 2016). In our research,  
385 *VdWRKY53* improved the resistance of GW53 to infection with *C. diplodiella*, PDC3000 and *G.*  
386 *cichoracearum* separately.

387         Innate immune perception triggers both local and systemic responses, allowing a plant to  
388 fight off pathogens both in a rapid and localized manner and on an extended scale of time and  
389 space. The plant defence response to pathogen invasion involves multiple biological processes:  
390 first, recognition of virulence factors; second, transfer to signalling modules (NB-LRR, NLRs  
391 and LRR receptor-like kinase); then, regulation of switch genes or proteins (WRKY) by  
392 different modules; and finally, activation of the resistance pathway response. In this study, WAK,  
393 LRRs, WRKYs, and PRs were in the K03 cluster, and co-expression was induced by the  
394 grapevine white rot pathogen in *DAC* at 12hpi time point. The key *WRKY* gene *VdWRKY53*  
395 improved Arabidopsis resistance to pathogen and bacteria invasion. Based on these data, we  
396 proposed that 20 candidate genes contributed to the resistance of *DAC* to grapevine white rot  
397 pathogen.

398

### 399 **Supplementary data**

400 Table S1. Primers of test genes

401 Table S2. KEGG pathways of DEGs at *V.davidii* and *V.vinifera* different infecting stages

402 Table S3. Details of KEGG pathways in the research



403 Table S4. Details of transcripts in k=03

404 **Acknowledgements**

405 This work was financially supported by the National Natural Science Foundation of China (No.  
406 31201599), the China Agriculture Research System (CARS-30), the Agricultural Science and  
407 Technology Innovation Program (CAAS-ASTIP-2017-ZFRI), and the Central Public-Interest  
408 Scientific Institution Basal Research Fund (1610192016202, 1610192017202).

409

## References

- Ali K, Maltese F, Zyprian E, Rex M, Choi YH, Verpoorte R.** 2009. NMR metabolic fingerprinting based identification of grapevine metabolites associated with downy mildew resistance. *Journal of Agricultural and Food Chemistry* **57**, 9599-9606.
- Altschul SF, Madden TL, Schaffer AA, Zhang J, Zhang Z, Miller W, Lipman DJ.** 1997. Gapped BLAST and PSI-BLAST: a new generation of protein database search programs. *Nucleic Acids Research* **25**, 3389-3402.
- Asai T, Tena G, Plotnikova J, Willmann MR, Chiu WL, Gomez-Gomez L, Boller T, Ausubel FM, Sheen J.** 2002. MAP kinase signalling cascade in *Arabidopsis* innate immunity. *Nature* **415**, 977-983.
- Bellin D, Peressotti E, Merdinoglu D, Wiedemann-Merdinoglu S, Adam-Blondon AF, Cipriani G, Morgante M, Testolin R, Di Gaspero G.** 2009. Resistance to *Plasmopara viticola* in grapevine 'Bianca' is controlled by a major dominant gene causing localised necrosis at the infection site. *Theoretical and Applied Genetics=Theoretische und Angewandte Genetik* **120**, 163-176.
- Broekaert WF, Delaure SL, De Bolle MF, Cammue BP.** 2006. The role of ethylene in host-pathogen interactions. *Annual Review of Phytopathology* **44**, 393-416.
- Chen C, Chen Z.** 2000. Isolation and characterization of two pathogen- and salicylic acid-induced genes encoding WRKY DNA-binding proteins from tobacco. *Plant Molecular Biology* **42**, 387-396.
- Chisholm ST, Coaker G, Day B, Staskawicz BJ.** 2006. Host-microbe interactions: shaping the evolution of the plant immune response. *Cell* **124**, 803-814.
- Clough SJ, Bent AF.** 1998. Floral dip: a simplified method for *Agrobacterium*-mediated transformation of *Arabidopsis thaliana*. *The Plant Journal* **16**, 735-743.
- Cormack RS, Eulgem T, Rushton PJ, Köchner P, Hahlbrock K, Somssich IE.** 2002. Leucine zipper-containing WRKY proteins widen the spectrum of immediate early elicitor-induced WRKY transcription factors in parsley. *Biochimica et Biophysica Acta*

(BBA) - Gene Structure and Expression **1576**, 92-100.

- Costantini L, Battilana J, Lamaj F, Fanizza G, Grando MS.** 2008. Berry and phenology-related traits in grapevine (*Vitis vinifera* L.): from quantitative trait loci to underlying genes. *BMC Plant Biology* **8**, 38.
- Du L, Chen Z.** 2000. Identification of genes encoding receptor-like protein kinases as possible targets of pathogen- and salicylic acid-induced WRKY DNA-binding proteins in *Arabidopsis*. *The Plant Journal: For Cell and Molecular Biology* **24**, 837-847.
- Eulgem T.** 2006. Dissecting the WRKY web of plant defense regulators. *PLoS Pathogens* **2**, e126.
- Eulgem T, Rushton PJ, Robatzek S, Somssich IE.** 2000. The WRKY superfamily of plant transcription factors. *Trends in Plant Science* **5**, 199-206.
- Eulgem T, Somssich IE.** 2007. Networks of WRKY transcription factors in defense signaling. *Current Opinion in Plant Biology* **10**, 366-371.
- Ferreira RB, Monteiro SS, Piçarra-Pereira MA, Teixeira AR.** 2004. Engineering grapevine for increased resistance to fungal pathogens without compromising wine stability. *Trends in Biotechnology* **22**, 168-173.
- Gillis J, Pavlidis P.** 2011. The role of indirect connections in gene networks in predicting function. *Bioinformatics* **27**, 1860-1866.
- Guillaumie S, Mzid R, Mechin V, Leon C, Hichri S, Destrac-Ivine A, Trossat-Magnin C, Delrot S, Lauvergeat V.** 2010. The grapevine transcription factor WRKY2 influences the lignin pathway and xylem development in tobacco. *Plant Mol Biol* **72**, 215-234.
- Greenberg JT, Yao N.** 2004. The role and regulation of programmed cell death in plant-pathogen interactions. *Cellular Microbiology* **6**, 201-211.
- Grenville-Briggs LJ, van West P.** 2005. The biotrophic stages of oomycete-plant interactions. *Advances in Applied Microbiology* **57**, 217-243.
- Hu Y, Dong Q, Yu D.** 2012. *Arabidopsis* WRKY46 coordinates with WRKY70 and WRKY53 in basal resistance against pathogen *Pseudomonas syringae*. *Plant Science: An*

- International Journal of Experimental Plant Biology **185-186**, 288-297.
- Huang Y, Li MY, Wu P, Xu ZS, Que F, Wang F, Xiong AS.** 2016. Members of WRKY group III transcription factors are important in TYLCV defense signaling pathway in tomato (*Solanum lycopersicum*). BMC Genomics **17**, 788.
- Huckelhoven R.** 2007. Cell wall-associated mechanisms of disease resistance and susceptibility. Annual Review of Phytopathology **45**, 101-127.
- Jaillon O, Aury JM, Noel B, et al.** 2007. The grapevine genome sequence suggests ancestral hexaploidization in major angiosperm phyla. Nature **449**, 463-467.
- Jones DA, Takemoto D.** 2004. Plant innate immunity-direct and indirect recognition of general and specific pathogen-associated molecules. Current Opinion in Immunology **16**, 48-62.
- Jones JD, Dangl JL.** 2006. The plant immune system. Nature **444**, 323-329.
- Kanehisa M, Goto S, Kawashima S, Okuno Y, Hattori M.** 2004. The KEGG resource for deciphering the genome. Nucleic Acids Research **32**, D277-D280.
- Kong QS.** 2004. Flora of Chinese grapes. Beijing, China: China Agricultural and Technology Press.
- Li F, Fan X-C, Liu C-H, Zhang Y, Jian G-F, Li M.** 2012. Investigation resistance to white rot in grapegermplasm resources. China Fruits **2012**, 72-74.
- Lighezan R, Baderca F, Alexa A, Iacovliev M, Bonte D, Murarescu ED, Nebunu A.** 2009. The value of the reprocessing method of paraffin-embedded biopsies for transmission electron microscopy. Romanian Journal of Morphology and Embryology=Revue Roumaine de Morphologie et Embryologie **50**, 613-617.
- Liu H, Yang W, Liu D, Han Y, Zhang A, Li S.** 2011. Ectopic expression of a grapevine transcription factor VvWRKY11 contributes to osmotic stress tolerance in *Arabidopsis*. Molecular Biology Reports **38**, 417-427.
- Ma ZY, Wen J, Ickert-Bond SM, Chen LQ, Liu XQ.** 2016. Morphology, structure, and ontogeny of Trichomes of the grape genus (*Vitis*, Vitaceae). Frontiers in Plant Science **7**, 704.

- Marguerit E, Boury C, Manicki A, Donnart M, Butterlin G, Nemorin A, Wiedemann-Merdinoglu S, Merdinoglu D, Ollat N, Decroocq S.** 2009. Genetic dissection of sex determinism, inflorescence morphology and downy mildew resistance in grapevine. *Theoretical and Applied Genetics=Theoretische und Angewandte Genetik* **118**, 1261-1278.
- Melotto M, Underwood W, He SY.** 2008. Role of stomata in plant innate immunity and foliar bacterial diseases. *Annual Review of Phytopathology* **46**, 101-122.
- Mortazavi A, Williams BA, McCue K, Schaeffer L, Wold B.** 2008. Mapping and quantifying mammalian transcriptomes by RNA-Seq. *Nature Methods* **5**, 621-628.
- Murray SL, Ingle RA, Petersen LN, Denby KJ.** 2007. Basal resistance against *Pseudomonas syringae* in *Arabidopsis* involves WRKY53 and a protein with homology to a nematode resistance protein. *Molecular Plant-Microbe Interactions* **20**, 1431-1438.
- Pandey SP, Somssich IE.** 2009. The role of WRKY transcription factors in plant immunity. *Plant Physiology* **150**, 1648-1655.
- Phukan UJ, Jeena GS, Shukla RK.** 2016. WRKY transcription factors: molecular regulation and stress responses in plants. *Frontiers in Plant Science* **7**, 760.
- Polesani M, Bortesi L, Ferrarini A, Zamboni A, Fasoli M, Zadra C, Lovato A, Pezzotti M, Delledonne M, Polverari A.** 2010. General and species-specific transcriptional responses to downy mildew infection in a susceptible (*Vitis vinifera*) and a resistant (*V. riparia*) grapevine species. *BMC Genomics* **11**, 117.
- Ramamoorthy R, Jiang SY, Kumar N, Venkatesh PN, Ramachandran S.** 2008. A comprehensive transcriptional profiling of the WRKY gene family in rice under various abiotic and phytohormone treatments. *Plant & Cell Physiology* **49**, 865-879.
- Rauscher M, Adam AL, Wirtz S, Guggenheim R, Mendgen K, Deising HB.** 1999. PR-1 protein inhibits the differentiation of rust infection hyphae in leaves of acquired resistant broad bean. *The Plant Journal: For Cell and Molecular Biology* **19**, 625-633.
- Sun Y, Yu D.** 2015. Activated expression of AtWRKY53 negatively regulates drought tolerance

- by mediating stomatal movement. *Plant Cell Reports* **34**, 1295-1306.
- Tao Y, Xie Z, Chen W, Glazebrook J, Chang HS, Han B, Zhu T, Zou G, Katagiri F.** 2003. Quantitative nature of *Arabidopsis* responses during compatible and incompatible interactions with the bacterial pathogen *Pseudomonas syringae*. *The Plant cell* **15**, 317-330.
- Tatusov RL, Galperin MY, Natale DA, Koonin EV.** 2000. The COG database: a tool for genome-scale analysis of protein functions and evolution. *Nucleic Acids Research* **28**, 33-36.
- Tripathi P, Rabara RC, Langum TJ, Boken AK, Rushton DL, Boomsma DD, Rinerson CI, Rabara J, Reese RN, Chen X.** 2012. The WRKY transcription factor family in *Brachypodium distachyon*. *BMC Genomics* **13**, 270.
- Ülker B, Shahid Mukhtar M, Somssich IE.** 2007. The WRKY70 transcription factor of *Arabidopsis* influences both the plant senescence and defense signaling pathways. *Planta* **226**, 125-137.
- Ulker B, Somssich IE.** 2004. WRKY transcription factors: from DNA binding towards biological function. *Current Opinion in Plant Biology* **7**, 491-498.
- Vanacker H, Carver TLW, Foyer CH.** 2000. Early H<sub>2</sub>O<sub>2</sub> accumulation in mesophyll cells leads to induction of glutathione during the hyper-sensitive response in the barley-powdery mildew interaction. *Plant Physiology* **123**, 1289-1300.
- Wang W, Devoto A, Turner JG, Xiao S.** 2007. Expression of the membrane-associated resistance protein RPW8 enhances basal defense against biotrophic pathogens. *Molecular Plant-Microbe Interactions* **20**, 966-976.
- Yu Y, Xu W, Wang J, Wang L, Yao W, Yang Y, Xu Y, Ma F, Du Y, Wang Y.** 2013. The Chinese wild grapevine (*Vitis pseudoreticulata*) E3 ubiquitin ligase *Erysiphe necator*-induced RING finger protein 1 (EIRP1) activates plant defense responses by inducing proteolysis of the VpWRKY11 transcription factor. *The New Phytologist* **200**, 834-846.

- Yu Y, Xu W, Wang S, Xu Y, Li H, Wang Y, Li S.** 2011. VpRFP1, a novel C4C4-type RING finger protein gene from Chinese wild *Vitis pseudoreticulata*, functions as a transcriptional activator in defence response of grapevine. *Journal of Experimental Botany* **62**, 5671-5682.
- Zhang B, Horvath S.** 2005. A general framework for weighted gene co-expression network analysis. *Statistical Applications in Genetics and Molecular Biology* **4**, Article17.
- Zhang Y, Feng JC.** 2014. Identification and characterization of the grape WRKY family. *BioMed Research International* **2014**, 787680.
- Zhang Y, Sun H-S, Fan X-C, Jiang J-F, Liu C-H.** 2013. Identification and evaluation of resistance of *Vitis* to grape white rot. *Journal of Fruit Science* **30**, 191-196.
- Zhu Z, Shi J, Cao J, He M, Wang Y.** 2012. VpWRKY3, a biotic and abiotic stress-related transcription factor from the Chinese wild *Vitis pseudoreticulata*. *Plant Cell Reports* **31**, 2109-2120.

**Table1. Comparison of leaf tissue thickness of two *Vitis* species**

| <b>Species</b>        | <b>Leaf thickness<br/>(<math>\mu\text{m}</math>)</b> | <b>Upper epidermis<br/>thickness (<math>\mu\text{m}</math>)</b> | <b>Palisade tissue<br/>thickness (<math>\mu\text{m}</math>)</b> | <b>Spongy tissue<br/>thickness (<math>\mu\text{m}</math>)</b> | <b>Lower epidermis<br/>thickness (<math>\mu\text{m}</math>)</b> |
|-----------------------|------------------------------------------------------|-----------------------------------------------------------------|-----------------------------------------------------------------|---------------------------------------------------------------|-----------------------------------------------------------------|
| <i>Vitis davidii</i>  | 91.13 $\pm$ 7.48 <sup>a</sup>                        | 12.43 $\pm$ 2.15 <sup>a</sup>                                   | 36.44 $\pm$ 4.32 <sup>a</sup>                                   | 36.33 $\pm$ 7.70 <sup>a</sup>                                 | 7.87 $\pm$ 1.72 <sup>a</sup>                                    |
| <i>Vitis vinifera</i> | 112.78 $\pm$ 18.50 <sup>a</sup>                      | 12.56 $\pm$ 2.82 <sup>a</sup>                                   | 42.75 $\pm$ 8.53 <sup>a</sup>                                   | 48.98 $\pm$ 8.49 <sup>a</sup>                                 | 9.43 $\pm$ 1.84 <sup>a</sup>                                    |

410 \* Data are mean  $\pm$  sd, n = 12, significant difference by analysis of variance.



**Table 2. Summary of transcriptomes data**

|                             | VIM1   | VIM2   | VIM3   | DAC1   | DAC2   | DAC3   |
|-----------------------------|--------|--------|--------|--------|--------|--------|
| Total reads (x1000)         | 76,192 | 76,999 | 67,696 | 67,447 | 71,886 | 73,179 |
| Base number (G)             | 7.62   | 6.7    | 6.76   | 6.74   | 7.18   | 7.32   |
| High-quality reads (%)      | 98.1   | 96.48  | 97.97  | 96.31  | 98.02  | 96.46  |
| Mapped reads (%)            | 88.01  | 87.27  | 87.43  | 77.33  | 76.96  | 77.14  |
| Number of transcripts       | 23,621 | 24,301 | 24,407 | 2,3441 | 25,537 | 24,018 |
| Number of novel transcripts | 961    | 971    | 997    | 938    | 1,020  | 957    |

**Table 3. Annotation of differentially expressed genes (DEGs) from six libraries.**

| DEG Set      | Annotated | COG   | GO    | KEGG | Swiss-Prot | nr    |
|--------------|-----------|-------|-------|------|------------|-------|
| DAC2_vs_DAC1 | 3,952     | 1,617 | 3,517 | 675  | 2,997      | 3,952 |
| DAC3_vs_DAC1 | 4,025     | 1,657 | 3,594 | 677  | 3,114      | 4,025 |
| VIM2_vs_VIM1 | 3,925     | 1,664 | 3,506 | 656  | 3,031      | 3,925 |
| VIM3_vs_VIM1 | 3,869     | 1,572 | 3,455 | 636  | 2,986      | 3,869 |

**Table 4. The Co-expression in K03 cluster details of candidate genes involving immune system of DAC were related to resistant to *C. diplodiella***

| Gene ID                         | Gene function                                         | RPKM value |           |            |            |            |            |
|---------------------------------|-------------------------------------------------------|------------|-----------|------------|------------|------------|------------|
|                                 |                                                       | VIM1       | VIM2      | VIM3       | DAC1       | DAC2       | DAC3       |
| VIT_18s0041g00020               | Wall-associated receptor kinase 2                     | 9.689896   | 13.35789  | 10.79321   | 22.35743   | 16.1210622 | 76.36481   |
| VIT_18s0001g11620               | Wall-associated receptor kinase 2                     | 0.42436    | 2.479711  | 0.601132   | 5.246519   | 19.84848   | 1.520792   |
| VIT_12s0035g00070               | LRR receptor-like serine/<br>threonine-protein kinase | 1.54826    | 2.86169   | 1.56953    | 16.8916    | 53.6436    | 54.9697    |
| VIT_12s0055g00580               | LRR receptor-like serine/<br>threonine-protein kinase | 1.351952   | 2.5520103 | 1.841092   | 5.4257649  | 24.084457  | 5.5218482  |
| VIT_12s0035g00180               | LRR receptor-like serine/<br>threonine-protein kinase | 0.750406   | 0.814589  | 1.07202    | 1.25927    | 33.9365    | 2.5213     |
| Vitis_vinifera<br>_newGene_4892 | LRR receptor-like serine/<br>threonine-protein kinase | 0.899727   | 0.0245324 | 0.04971    | 1.79436    | 8.41789    | 1.21961    |
| Vitis_vinifera<br>_newGene_4928 | LRR receptor-like serine/<br>threonine-protein kinase | 1.67189    | 11.7781   | 0          | 10.7038    | 27.3047    | 5.41412    |
| VIT_07s0005g02570               | WRKY transcription factor                             | 20.39015   | 128.83849 | 26.54005   | 34.65061   | 186.7816   | 36.9177    |
| <b>VIT_16s0050g02510</b>        | <b>WRKY transcription factor</b>                      | 15.6605    | 36.7449   | 23.8597    | 21.4326    | 103.314    | 24.7179    |
| VIT_07s0005g01710               | WRKY transcription factor                             | 6.5624     | 7.35796   | 3.60829    | 6.81616    | 20.64      | 3.8377     |
| VIT_01s0010g03930               | WRKY transcription factor                             | 4.07527    | 32.4315   | 5.70703    | 22.1046    | 96.5928    | 21.8077    |
| VIT_17s0000g01280               | WRKY transcription factor                             | 0.306743   | 3.68295   | 0.441533   | 2.62295    | 10.4016    | 9.98668    |
| VIT_19s0090g00840               | WRKY transcription factor                             | 0.4447659  | 4.63589   | 0.30357971 | 9.9292026  | 68.052348  | 2.17351734 |
| VIT_10s0003g02810               | WRKY transcription factor                             | 1.36916    | 3.7707    | 1.4684     | 25.9585    | 27.7092    | 4.30239    |
| VIT_01s0026g01730               | WRKY transcription factor                             | 1.723862   | 14.588    | 2.922619   | 5.46501211 | 27.036     | 2.7636535  |
| VIT_05s0077g00730               | WRKY transcription factor                             | 13.330992  | 26.9002   | 7.246623   | 75.25308   | 109.90206  | 22.386063  |
| VIT_10s0003g01600               | WRKY transcription factor                             | 11.8002    | 76.5289   | 17.1084    | 47.3846    | 104.561    | 46.8014    |
| VIT_02s0025g00420               | WRKY transcription factor                             | 0.195665   | 2.59785   | 0.624419   | 0.464592   | 13.4431    | 1.64438    |
| VIT_11s0052g01620               | Pathogenesis-related protein PR-1                     | 2.35673    | 0.90294   | 3.85426    | 0.976269   | 18.1247    | 7.39029    |
| VIT_14s0081g00020               | Pathogenesis-related protein PR-1                     | 5.2547252  | 4.563528  | 0.86386283 | 17.212108  | 69.535528  | 4.8717034  |

## Figure legends

### Fig. 1 Vitis leaf structure and symptoms of *C. diplodiella* infection.

411 (a) Anatomical structure of in *Vitis vinifera* cv. Manicure Finger (*VIM*) and *Vitis davidii* cv. Ciputao  
412 0941(*DAC*) . Leave samples were collected from 2-week old leaves at the 3-4 position on a branch. At  
413 microstructure level, leaf thickness, upper epidermis thickness, palisade tissue thickness, spongy  
414 thickness, lower epidermis thickness were not significant variation in between *DAC* and *VIM*. At  
415 ultrastructure level, *DAC* had more chloroplasts in palisade than *VIM*. (b) Symptoms in *DAC* and *VIM*  
416 after *C. diplodiella* infection. Typical hypersensitive response (HR) symptoms were shown in *DAC* but  
417 not in *VIM* at 12 hpi (hours post infection) and 36 hpi. (c) *C. diplodiella* infected leaves were examined  
418 under a microscope at 12 hpi and 36 hpi to show fungal spore germination and growth. *C. diplodiella*  
419 spore germination was observed on *VIM* leaves at 12 hpi and on *DAC* leaves at 36 hpi.

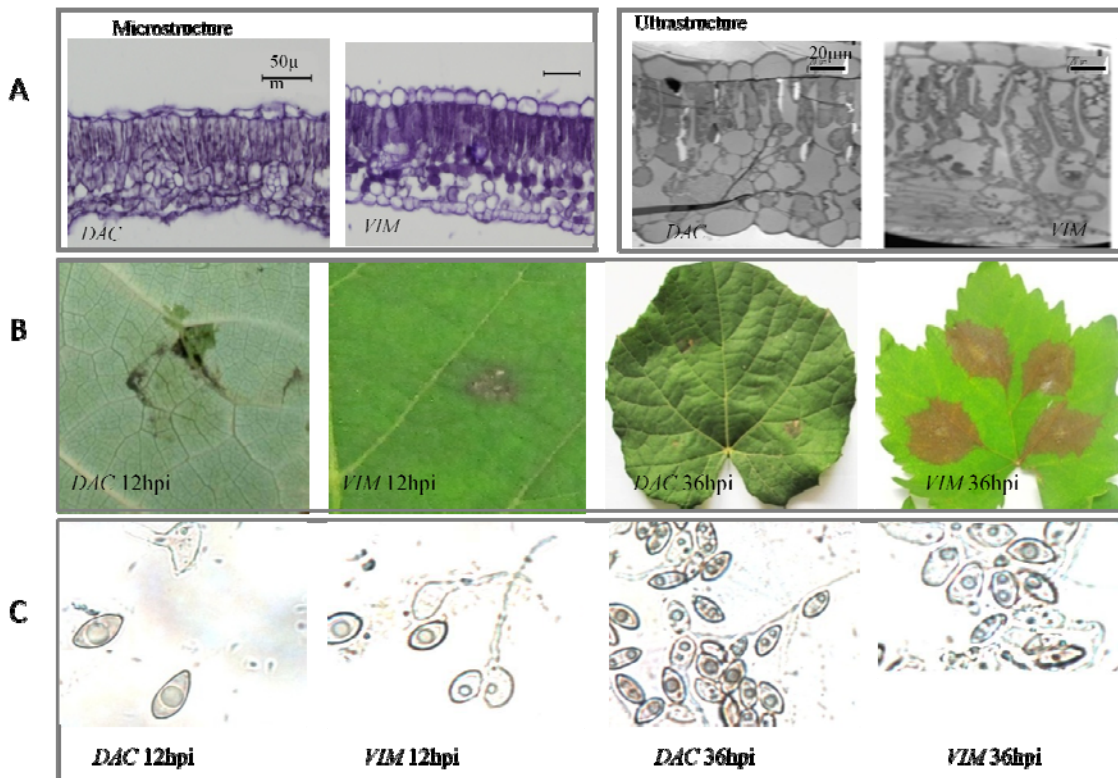

420  
421  
422  
423  
424  
425  
426  
427  
428

**Fig. 2** Number of differentially expressed genes (DEGs) in DAC and VIM leaves following infection with *C. diplodiella*.

429 Venn diagrams show the number of DEGs, up or down regulated ( $P < 0.0001$ , fold  $> 2.0$ ), in *DAC* and  
 430 *VIM* leaves at 12, 36 hpi, and both 12 and 36 hpi compared to 0 hpi. There were more DEGs in resistant  
 431 genotype *DAC* than in the susceptible genotype *VIM*.  
 432

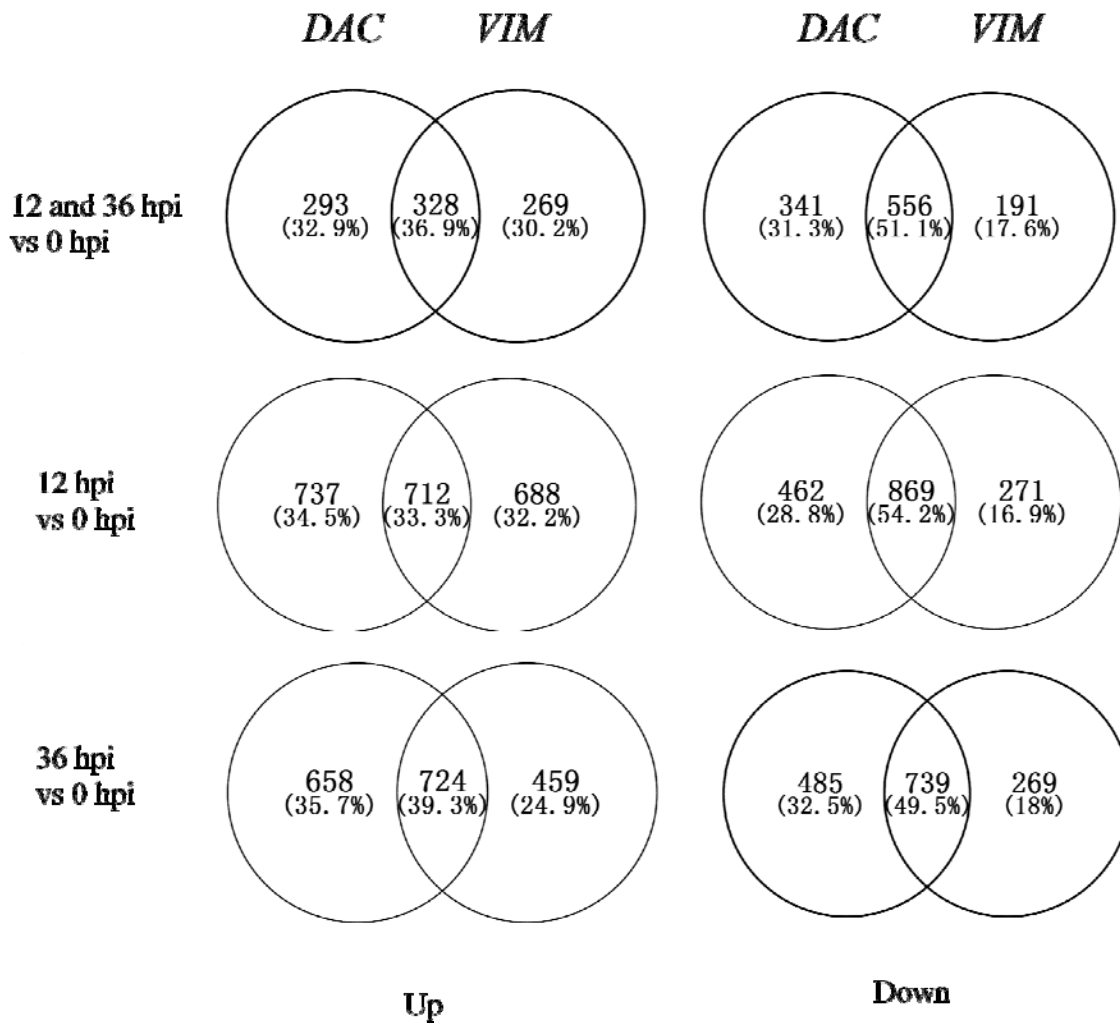

433  
 434  
 435  
 436  
 437  
 438  
 439  
 440  
 441

442

**Fig. 3 The subcluster 03 from analysis coexpression by K-means analysis.**

443 All DEGs were divided 50 co-expression clusters (K=50) by MeV K-means analysis. In Subcluster  
444 03(k=3),152 DEGs were clustered significant coexpression tendency at 12 hpi, red arrow indicate to the  
445 expression genes.

446

447

Subcluster 03 log<sub>2</sub> median centered rpk matrix 152 transcripts

448

449

450

451

452

453

454

455

456

457

458

459

460

461

462

463

464

465

466

467

468

469

470

471

472

473

474

475

476

477

478

479

480

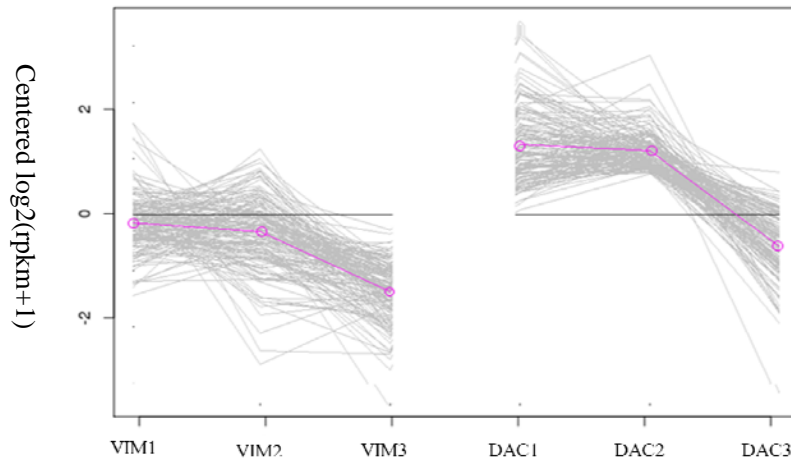

**Fig. 4 Comparison of RNA-seq data with quantitative RT-PCR results in candidate genes.**

481 152 DEGs were clustered in K03 showed 20 resistance related genes significant different expression at 12  
 482 hpi (Figure3). Candidate genes (at 12hpi) identified by both RNA-seq and quantitative RT-PCR,  
 483 respectively. The numbers 20 genes identified by RNA-seq, which represent Wall-associated receptor  
 484 kinase 2(VIT\_18s0041g00020, VIT\_18s0001g11620), LRR receptor-like serine/threonine-protein kinase  
 485 (VIT\_12s0035g00070, VIT\_12s0055g00580, VIT\_12s0035g00180, Vitis\_vinifera\_newGene\_4892,  
 486 Vitis\_vinifera\_newGene\_4928), WRKY transcription factors (VIT\_07s0005g02570,  
 487 VIT\_16s0050g02510, VIT\_07s0005g01710, VIT\_01s0010g03930, VIT\_17s0000g01280,  
 488 VIT\_19s0090g00840, VIT\_10s0003g02810, VIT\_01s0026g01730, VIT\_05s0077g00730,  
 489 VIT\_10s0003g01600, VIT\_02s0025g00420), Pathogenesis-related protein PR (VIT\_11s0052g01620,  
 490 VIT\_14s0081g00020).\_  
 491  
 492

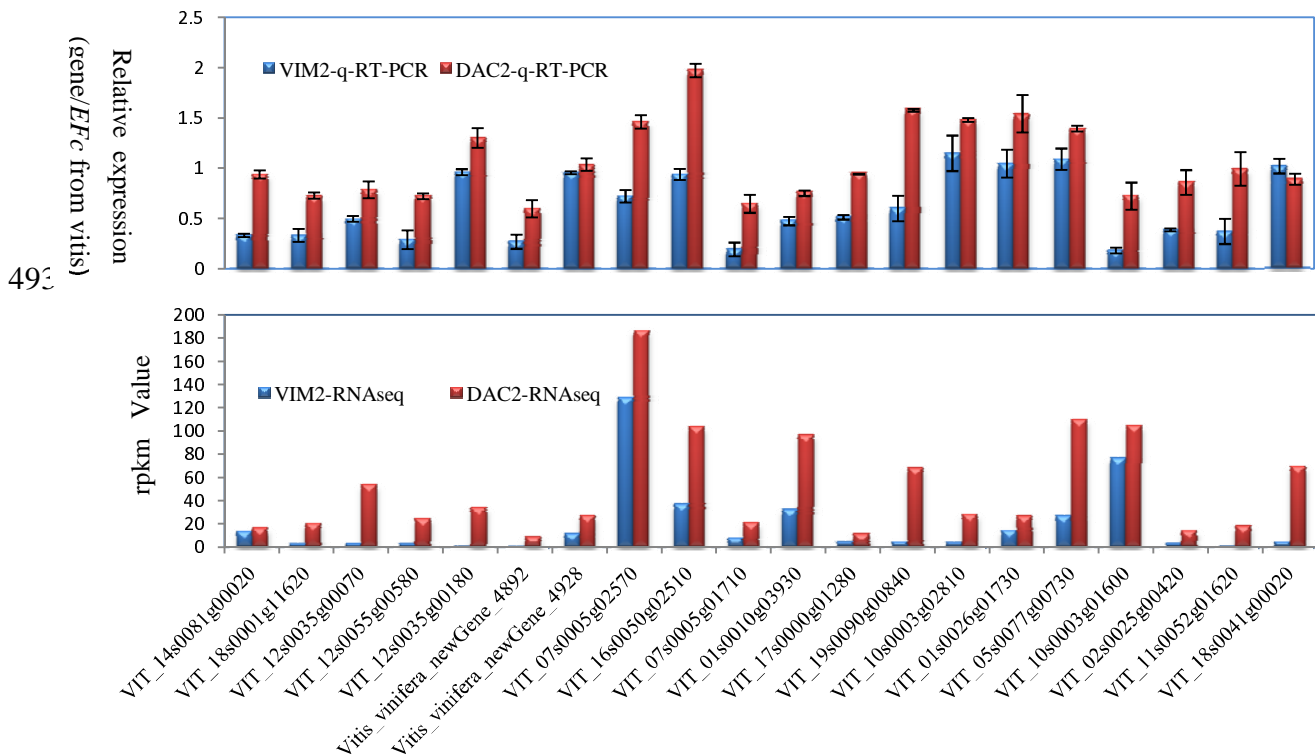

**Fig. 5 The phylogenetic relationship among the subfamily III WRKY transcription factors of *Vitis* and *A. thaliana*.**

501 The phylogenetic tree were constructed using full-length amino acid sequence (listed in Supplementary 4)  
502 and neighbor joining (NJ) method in Clustal X version 1.83 and Mega version 5.0. Bootstrap values  
503 (shown on branches) were calculated from 1,000 iterations.

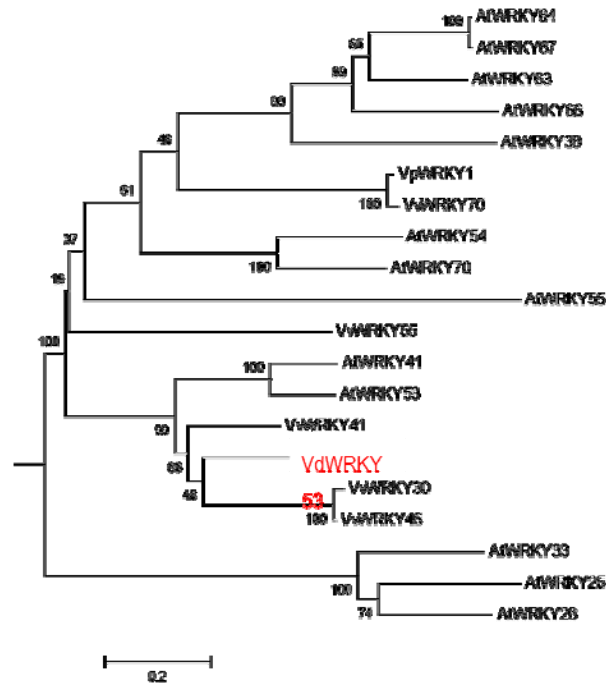

504  
505  
506  
507  
508  
509  
510  
511  
512  
513  
514  
515  
516  
517  
518  
519  
520  
521  
522  
523  
524  
525  
526  
527  
528  
529  
530  
531  
532  
533  
534  
535  
536  
537



**Fig. 6 Quantitative PCR analyses of VdWRKY53 gene expression in wildtype and transgenic Arabidopsis plants.** The expression levels of *VdWRKY53* in three wildtype (Col-1, 2, 3) and three transgenic lines (GW53-1, -2, and -3) were analyzed at different stages of infection by pathogens *G. cichoracearum*, *C. diplodiella* and *P. syringae* pv *tomato* PDC3000. Error bars represent the standard deviation of three independent PCR reactions. NI, not infected. h, hours after infection.

538  
539  
540  
541  
542  
543  
544  
545  
546  
547  
548  
549  
550  
551  
552  
553  
554  
555  
556  
557  
558  
559  
560  
561  
562  
563  
564  
565  
566  
567  
568  
569  
570

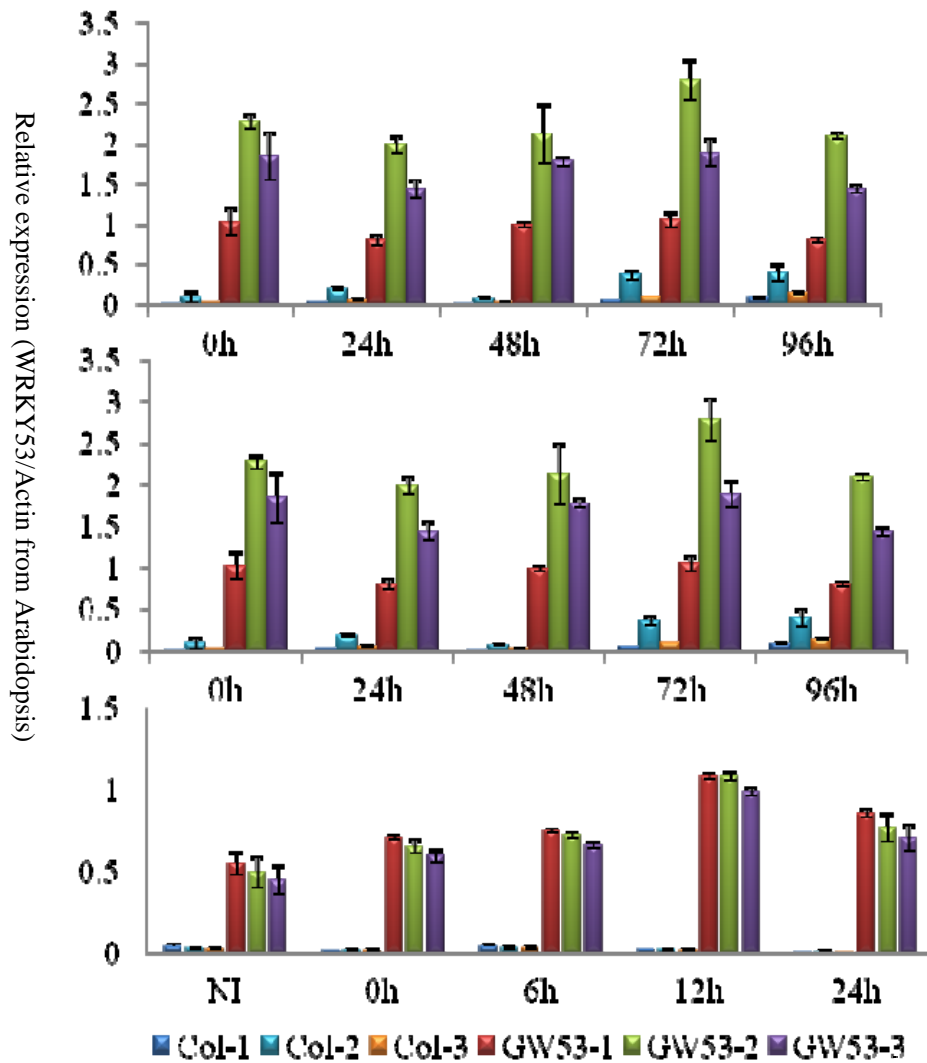

**Fig. 7 Transgenic *Arabidopsis* plants over-expressing *VdWRKY53* showed enhanced resistance to pathogens**

571 Kanamycin resistant T2 plants from three different T1 lines were infected with pathogens *G.*  
572 *cichoracearum*, *C. diplodiella* and *P. syringae* pv *tomato* PDC3000, separately. The images show the  
573 results of one transgenic line along with wildtype controls at 3 or 5 days post infection (dpi). The plants of  
574 other transgenic lines displayed similar results.  
575

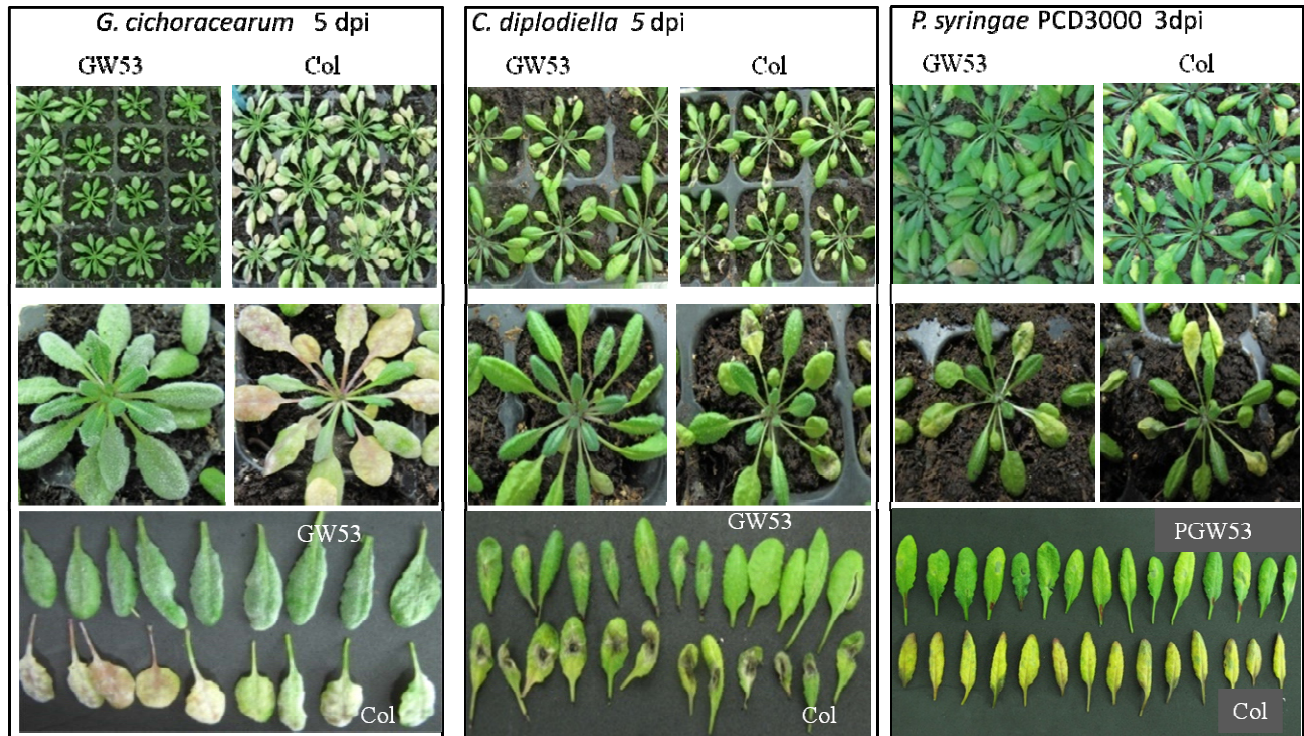

576  
577  
578  
579  
580  
581  
582  
583  
584  
585  
586  
587  
588  
589  
590  
591

**Fig. 8 Percentage of Arabidopsis leaves were free of symptoms after pathogen infection.**

592 Kanamycin resistant T2 plants from three different T1 lines were infected with pathogens *G.*  
593 *cichoracearum*, *C. diplodiella* and *P. syringae* pv *tomato* PDC3000, separately. Disease symptoms were  
594 visually examined on 33 leaves for each line and each infection at 3 dpi (days post infection) for *P.*  
595 *syringae* pv *tomato* PDC3000 and at 5 dpi for *G. cichoracearum* and *C. diplodiella* infection. Error bars  
596 represent the standard deviation of three transgenic lines or three populations of wildtype control plants.  
597

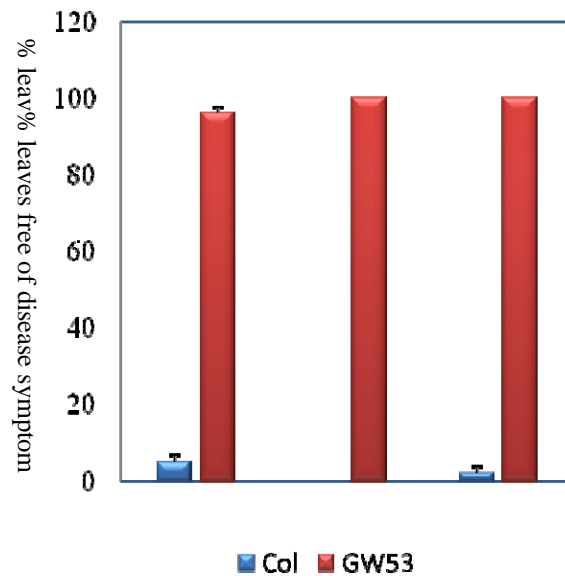

Source: http://www.biorxiv.org/content/10.1101/169631v1.full.pdf
